# Supplementary material for: Building-level wastewater surveillance using tampon swabs and RT-LAMP for rapid SARS-CoV-2 RNA detection
Source: Royal Society of Chemistry journal article supplement (doi:10.1039/d1ew00496d), 2021-09-23
Supplement: d1ew00496d1.pdf [file d1ew00496d1.pdf]

# **Supplementary Information: Building-level wastewater surveillance using tampon swabs and RT-LAMP for rapid SARS-CoV-2 RNA detection**

Aaron Bivins<sup>1,2</sup>, Megan Lott<sup>3</sup>, Marlee Shaffer<sup>1</sup>, Zhenyu Wu<sup>1</sup>, Devin North<sup>1</sup>, Erin K. Lipp<sup>3</sup>, Kyle Bibby<sup>1,2\*</sup>

<sup>1</sup> Department of Civil & Environmental Engineering & Earth Sciences, University of Notre Dame,  
156 Fitzpatrick Hall, Notre Dame, IN 46556

<sup>2</sup> Environmental Change Initiative, University of Notre Dame, 721 Flanner Hall, Notre Dame, IN  
46556

<sup>3</sup> Department of Environmental Health Science, University of Georgia, 150 East Green Street,  
Athens, GA 30602

\*[kbibby@nd.edu](mailto:kbibby@nd.edu)

Detailed Procedure: Centrifugal Ultrafilter Concentration

Detailed Procedure: Swab Sorbate Solids Fractionation

Detailed Procedure: Heat Extraction & No Extraction

Heat Extraction Inhibition Results

No Extraction Inhibition Results

Detailed Procedure: Electronegative Membrane Concentration

Detailed Procedure: RT-ddPCR

Table S1 WWTP Characteristics

Table S2 RT-LAMP Primers

Table S3 Sample summary table

Figure S1 RT-LAMP true positive rate

Figure S2 RT-LAMP 95% and 67% LODs

Figure S3 Composite versus passive inhibition rates by extraction kit

Figure S4 Viral RNA Mini versus Power Viral inhibition rates by sample type

Figure S5 Inhibition rate and positivity of tampon swab sorbate fractions

Figure S6 WW proportion positive by RT-LAMP and COVID-19 clinical metrics aggregated for  
all residence halls included in wastewater monitoring

Figure S7 RT-LAMP COVID-19 case PPV and NPV stratified by residence halls and weeks of  
monitoring

Figure S8 RT-LAMP COVID-19 case PPV and NPV

Figure S9 RT-LAMP results frequency distribution for convalescent COVID-19 cases returning  
to residence halls from quarantine

### 39 *Centrifugal Ultrafilter Concentration*

40 A subset of swab sorbate samples were concentrated by passing 15 mL of sorbate through an  
41 Amicon Ultra-15 10 kDa Centrifugal Filter Unit (MilliporeSigma, MA, USA) via a 5,000 x g spin for  
42 30 minutes. The retentate was resuspended in 1 mL of PBS/Tween20 solution and 500 µL was  
43 transferred into a 2 mL PowerBead tube containing 0.1 mm glass beads (Qiagen, Hilden,  
44 Germany) for homogenization prior to extraction. Owing to difficulty passing the entire 15 mL  
45 volume through the ultrafilter, this concentration method was abandoned after the first week of  
46 sampling.

47

### 48 *Swab Sorbate Solids Fractionation*

49 Since enveloped viruses, including SARS-CoV-2, partition favorably to solids in wastewater (1,2),  
50 after abandoning ultrafiltration, swab sorbate samples at ND were processed with emphasis on  
51 the solids fraction. Each 50 mL sorbate volume was subjected to centrifugation at 10,000 x g for  
52 10 minutes at 4°C. The supernatant was poured off and the pellet was resuspended using 1 mL  
53 of PBS/Tween20 solution. A 500 µL aliquot of the resuspension was transferred into a 2 mL  
54 PowerBead tube containing 0.1 mm glass beads (Qiagen, Hilden, Germany) for homogenization  
55 prior to extraction. For a subset of samples, 15 mL of the resulting supernatant was concentrated  
56 via Amicon as described above.

57

### 58 *Heat Extraction & No Extraction*

59 A subset of 1 mL swab sorbate samples and 1 mL re-suspended solids samples were subjected  
60 to heat extraction by incubation in a heat block at 95°C for 15 minutes. After incubation, the  
61 samples, contained in 2 mL microcentrifuge tubes, were centrifuged at 13,000 x g for 2 minutes  
62 and 100 µL of supernatant was transferred to a clean 2 mL centrifuge tube for testing by RT-  
63 LAMP. A subset of primary influent samples was also tested by RT-LAMP without extraction or  
64 pre-treatment.

### 65 *Heat Extraction Inhibition Rate*

66 After heat extraction, 100% of swab sorbate samples (n=5) were inhibited and remained so even  
67 after 1:10 dilution. Among the five solid fraction samples, 100% were inhibited after heat  
68 extraction, and 40% remained so even after 1:10 dilution. Given the high rate of inhibition, we  
69 abandoned heat extraction as a reliable method for detection in wastewater via RT-LAMP.

70

### 71 *No Extraction Inhibition Rate*

72 We attempted extraction-free RT-LAMP on five tampon swab sorbate and four 24-hour composite  
73 samples of WWTP influent. The inhibition rate among the five undiluted passive samples was  
74 100%. The inhibition rate for undiluted composite samples was 100% when using 7  $\mu$ L or 4  $\mu$ L of  
75 input. After 1:10 dilution, no inhibition was observed for 7  $\mu$ L of input. Given the dilution required  
76 to remedy inhibition and the resulting 10x increase in the 95% LOD, we abandoned extraction-  
77 free RT-LAMP as a reliable detection method.

78

### 79 *Electronegative Membrane Concentration*

80 Primary influent samples and raw sewage composite samples were concentrated using  
81 electronegative membrane filtration. Briefly, a 100 mL aliquot of well-mixed sample was filtered  
82 through a 0.45  $\mu$ m mixed-cellulose ester membrane (Pall Corporation, Port Washington, NY,  
83 USA) using a vacuum filtration assembly (Sigma-Aldrich, St. Louis, MO, USA). The membrane  
84 was then aseptically rolled into a 2 mL Garnet bead tube (Qiagen, Hilden, Germany) and frozen  
85 at -80°C until homogenization prior to extraction.

86

### 87 *RT-ddPCR*

88 For RT-LAMP validation, SARS-CoV-2 RNA was quantified using the BioRad QX200 Droplet  
89 Digital PCR (ddPCR) System and C1000 Touch Thermal Cycler (Hercules, CA, USA) as  
90 previously described in detail (Bivins et al. 2021 preprint). Reverse transcription and droplet digital

91 PCR were performed in a single step using the One-Step RT-ddPCR Advanced Kit for Probes  
92 (BioRad, Hercules, CA, USA) using the premixed N1 assay (Liu et al. 2020). RT-ddPCR reactions  
93 were prepared in triplicate at a volume of 22 uL consisting of 4 uL sample RNA, 6.45 uL PCR-  
94 grade water, 5.25 uL 4X Supermix, 2.1 uL reverse transcriptase, 1.05 uL dithiothreitol, and 3.15  
95 uL of premixed N1 primers and probes (resulting concentrations of 1000 nM and 250 nM,  
96 respectively) from Integrated DNA Technologies (Coralville, IA, USA). A 20 uL volume of the  
97 reaction mixture, prepared per the BioRad protocol, was pipette mixed and transferred into the  
98 droplet generation step. Following thermal cycling (50°C 60 minutes; 95°C 10 minutes; 40 cycles  
99 of 95°C 30 seconds and 59°C one minute; 98°C 10 minutes; 4°C hold), droplet fluorescence  
100 amplitudes were read, classified as positive or negative, and the N1 copy number calculated using  
101 manual thresholding in QuantaSoft Version 1.7.4 (BioRad, Hercules, CA, USA) such that all  
102 pertinent negative controls contained no positive droplets.

103

104 Table S1 | Characteristics of the 11 WWTPs from which primary influent composite samples  
105 were collected for RT-LAMP performance assessment compared to RT-ddPCR. All data were  
106 extracted from the Discharge Monitoring Report in the US EPA Enforcement and Compliance  
107 History Online database (<https://echo.epa.gov/>).  
108

| WWTP | Population Served | Design Flow (MGD) | Average Flow (MGD) |
|------|-------------------|-------------------|--------------------|
| 1    | 109,294           | 48                | 28.63              |
| 2    | 46,557            | 20                | 11.41              |
| 3    | 56,227            | 20                | 12.14              |
| 4    | 19,054            | 6                 | 3.48               |
| 5    | 75,138            | 24                | 5.91               |
| 6    | 79,652            | 15                | 12.57              |
| 7    | 22,627            | 5.13              | 5.01               |
| 8    | 6,541             | 3.90              | 3.18               |
| 9    | 36,063            | 10.50             | 4.91               |
| 10   | 7,304             | 1.70              | 1.12               |
| 11   | 8,329             | 2.80              | 1.83               |

109

110 Table S2 | SARS-CoV-2 (N2 and E1) and internal control (ACTB) primers used in the NEB  
 111 SARS-CoV-2 Rapid Colorimetric LAMP Assay Kit (E2019S).

112

|            |                                              |
|------------|----------------------------------------------|
| NEB_N2-F3  | ACCAGGAACTAATCAGACAAG                        |
| NEB_N2-B3  | GACTTGATCTTTGAAATTTGGATCT                    |
| NEB_N2-FIP | TTCCGAAGAACGCTGAAGCGGAACTGATTACAAACATTGGCC   |
| NEB_N2-BIP | CGCATTGGCATGGAAGTCACAATTTGATGGCACCTGTGTA     |
| NEB_N2-LF  | GGGGGCAAATTGTGCAATTTG                        |
| NEB_N2-LB  | CTTCGGGAACGTGGTTGACC                         |
| NEB_E1-F3  | TGAGTACGAACTTATGTACTCAT                      |
| NEB_E1-B3  | TTCAGATTTTTAACACGAGAGT                       |
| NEB_E1-FIP | ACCACGAAAGCAAGAAAAAGAAGTTCGTTTCGGAAGAGACAG   |
| NEB_E1-BIP | TTGCTAGTTACACTAGCCATCCTTAGGTTTTACAAGACTCACGT |
| NEB_E1-LB  | GCGCTTCGATTGTGTGCGT                          |
| NEB_E1-LF  | CGCTATTAACATTAACG                            |
| ACTB-F3    | AGTACCCCATCGAGCACG                           |
| ACTB-B3    | AGCCTGGATAGCAACGTACA                         |
| ACTB-FIP   | GAGCCACACGCAGCTCATTGTATCACCAACTGGGACGACA     |
| ACTB-BIP   | CTGAACCCCAAGGCCAACCGGCTGGGGTGTGTAAGGTC       |
| ACTB-LF    | TGTGGTGCCAGATTTTCTCCA                        |
| ACTB-LB    | CGAGAAGATGACCCAGATCATGT                      |

113

114

115 Table S3 | Passive sampling and RT-LAMP methods development and surveillance sample  
 116 summary table.  
 117

| Sample Type                                                                   | Unique<br>WW<br>Sample (n) | Extraction (n)                                                                      | RT-<br>LAMP | RT-<br>ddPCR |
|-------------------------------------------------------------------------------|----------------------------|-------------------------------------------------------------------------------------|-------------|--------------|
| <i>Experimental Purpose: sensitivity, specificity, analytical sensitivity</i> |                            |                                                                                     |             |              |
| primary influent 24-hour composite                                            | 42                         | PowerViral (42)                                                                     | Y           | Y            |
| raw sewage from tampon swab                                                   | 7                          | PowerViral (7)                                                                      | Y           | Y            |
| <i>Experimental Purpose: extraction and processing methods</i>                |                            |                                                                                     |             |              |
| primary influent 24-hour composite                                            | 42                         | Viral RNA Mini (9)<br>PowerViral (33)                                               | Y           | Y            |
| raw sewage from tampon swab                                                   | 68                         | Viral RNA Mini (5)<br>PowerViral (63)<br>No extraction (17)<br>Heat extraction (10) | Y           | N            |
| <i>Experimental Purpose: Prospective surveillance</i>                         |                            |                                                                                     |             |              |
| raw sewage                                                                    | 53                         | PowerViral (53)                                                                     | Y           | N            |

118

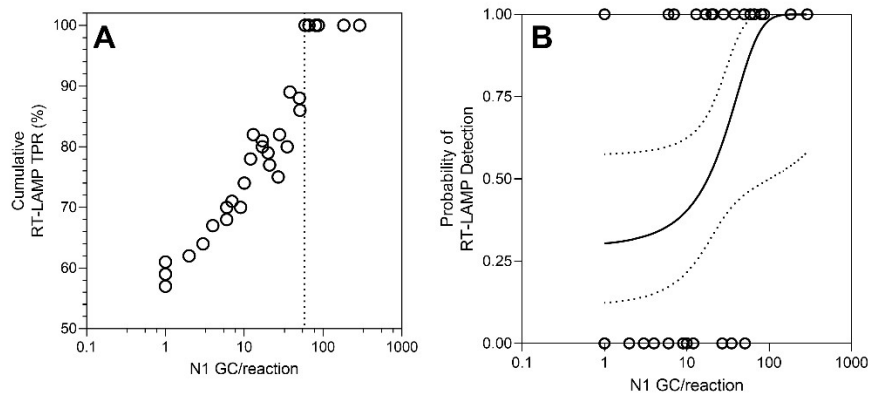

Figure S1 | (A) RT-LAMP cumulative true positive rate (sensitivity; y-axis) among individual reactions along an N1 gene copy (GC) per reaction gradient (x-axis); (B) SARS-CoV-2 RNA probability of detection among RT-LAMP triplicates (y-axis) as estimated by a logistic regression model ( $p = 0.0034$ ;  $R^2 = 0.24$ ) along the same N1 GC gradient (x-axis).

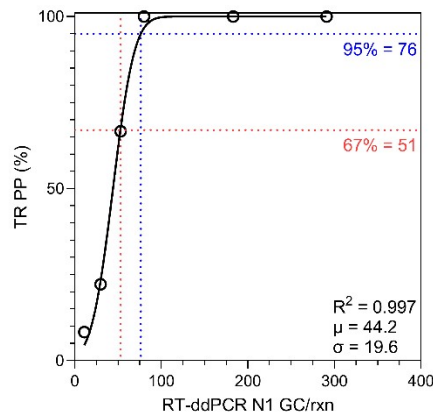

Figure S2 | The 95% and 67% limits of detection (LODs) for a single RT-LAMP reaction as measured along a concentration gradient of N1 gene copies per reaction (rxn) quantified by RT-ddPCR (x-axis). The percentage of technical replicates positive (TR PP; y-axis) was best fit ( $R^2 = 0.997$ ) by a Gaussian distribution with a mean of 44.2 and standard deviation of 19.6.



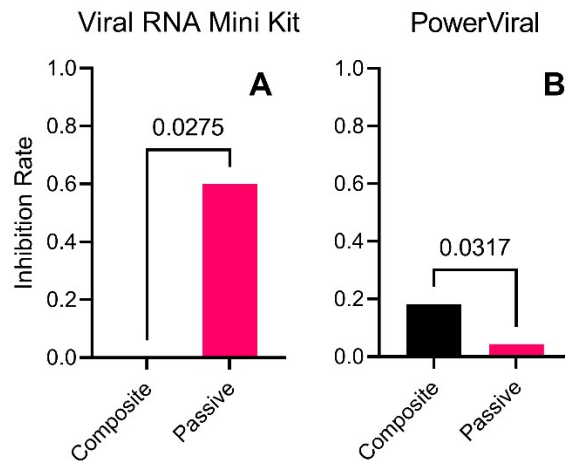

Figure S3 | RT-LAMP inhibition rates among primary influent composite samples (black) and tampon swab sorbate samples (pink) extracted via (A) the Viral RNA Mini Kit and (B) the AllPrep PowerViral DNA/RNA Kit.

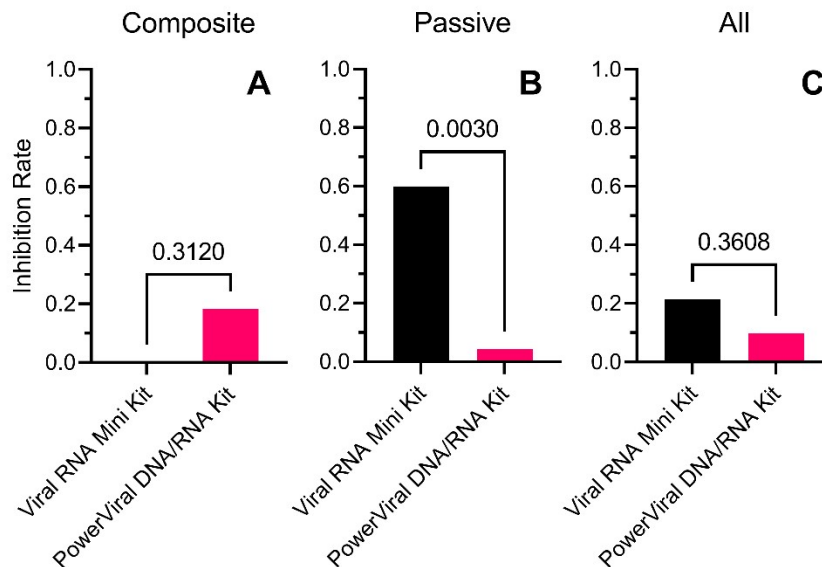

Figure S4 | RT-LAMP inhibition rates among (A) primary influent composite samples, (B) tampon swab sorbate samples, and (C) all wastewater samples extracted via the Viral RNA Mini Kit (black) and the AllPrep PowerViral DNA/RNA Kit (pink).

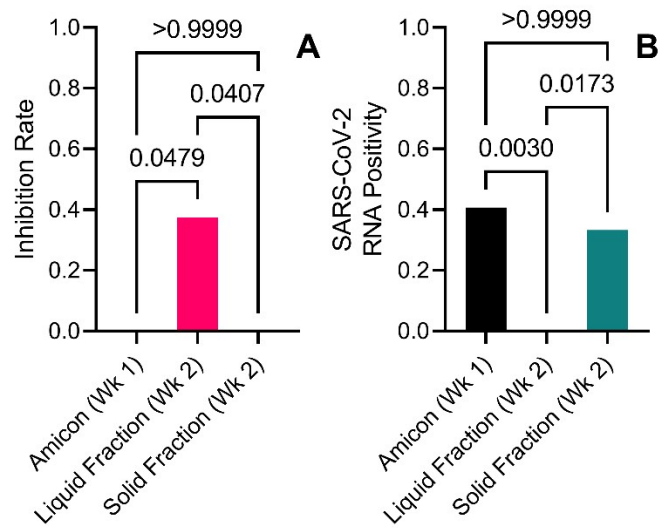

145  
146

147 Figure S5 | (A) RT-LAMP inhibition rates among tampon swab sorbate processed by Amicon  
148 ultrafiltration, liquid faction only processed by Amicon ultrafiltration, and solid fraction (A), and (B)  
149 SARS-CoV-2 RNA positivity by RT-LAMP among the same.

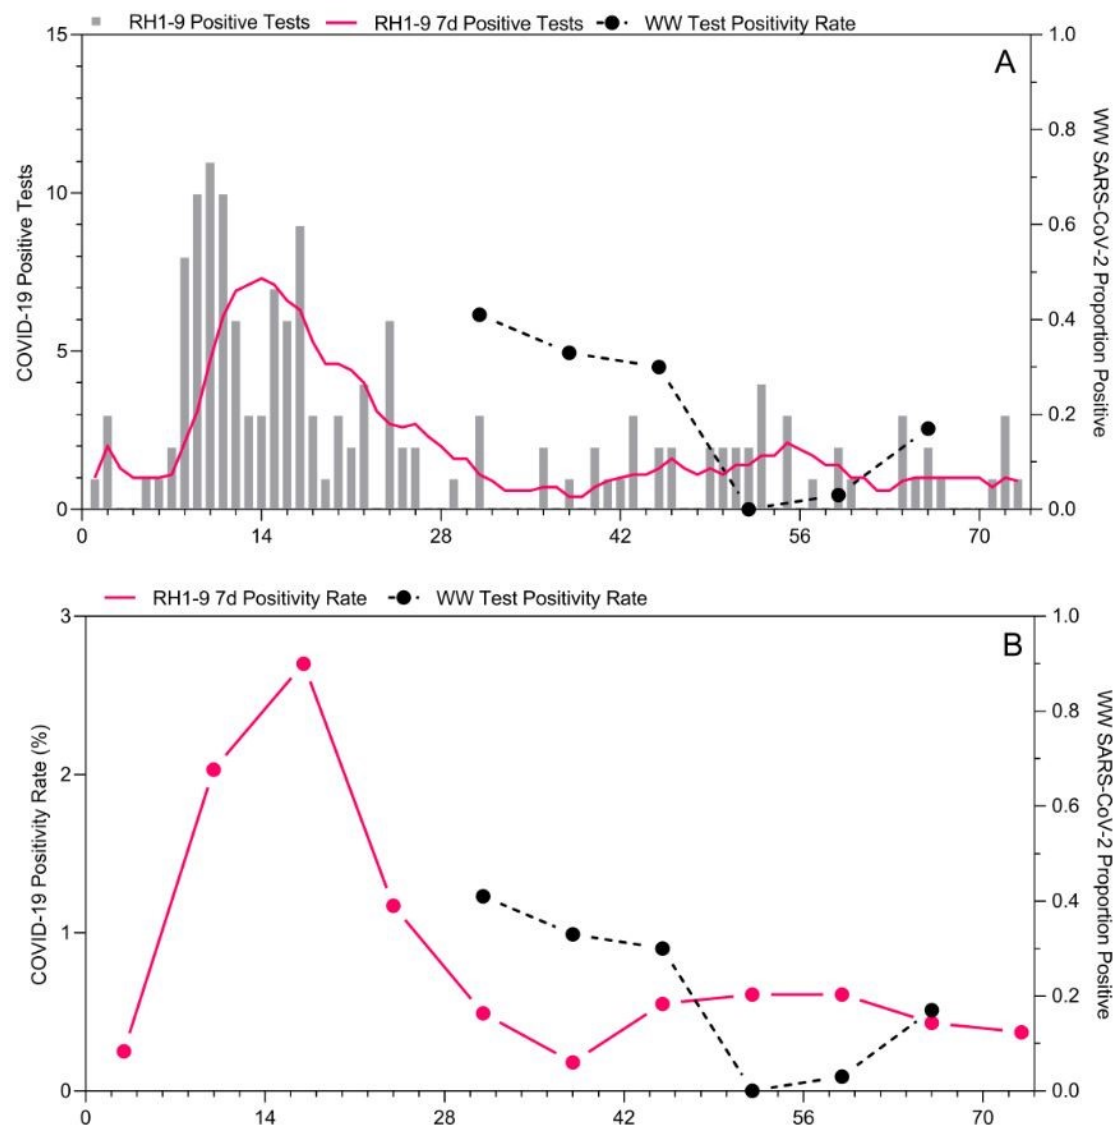

151

152

153 Figure S6 | (A) COVID-19 clinical positives and average 7-day number of positives (left y-axis)  
154 and wastewater (WW) SARS-CoV-2 proportion positive (right y-axis) in the nine residence halls  
155 included in wastewater monitoring during the study period from 0 to 73 days (x-axis); (B) COVID-  
156 19 clinical testing weekly positivity (left y-axis) and wastewater (WW) SARS-CoV-2 proportion  
157 positive (right y-axis) in the nine residence halls included in wastewater monitoring during the  
158 study period from 0 to 73 days (x-axis).

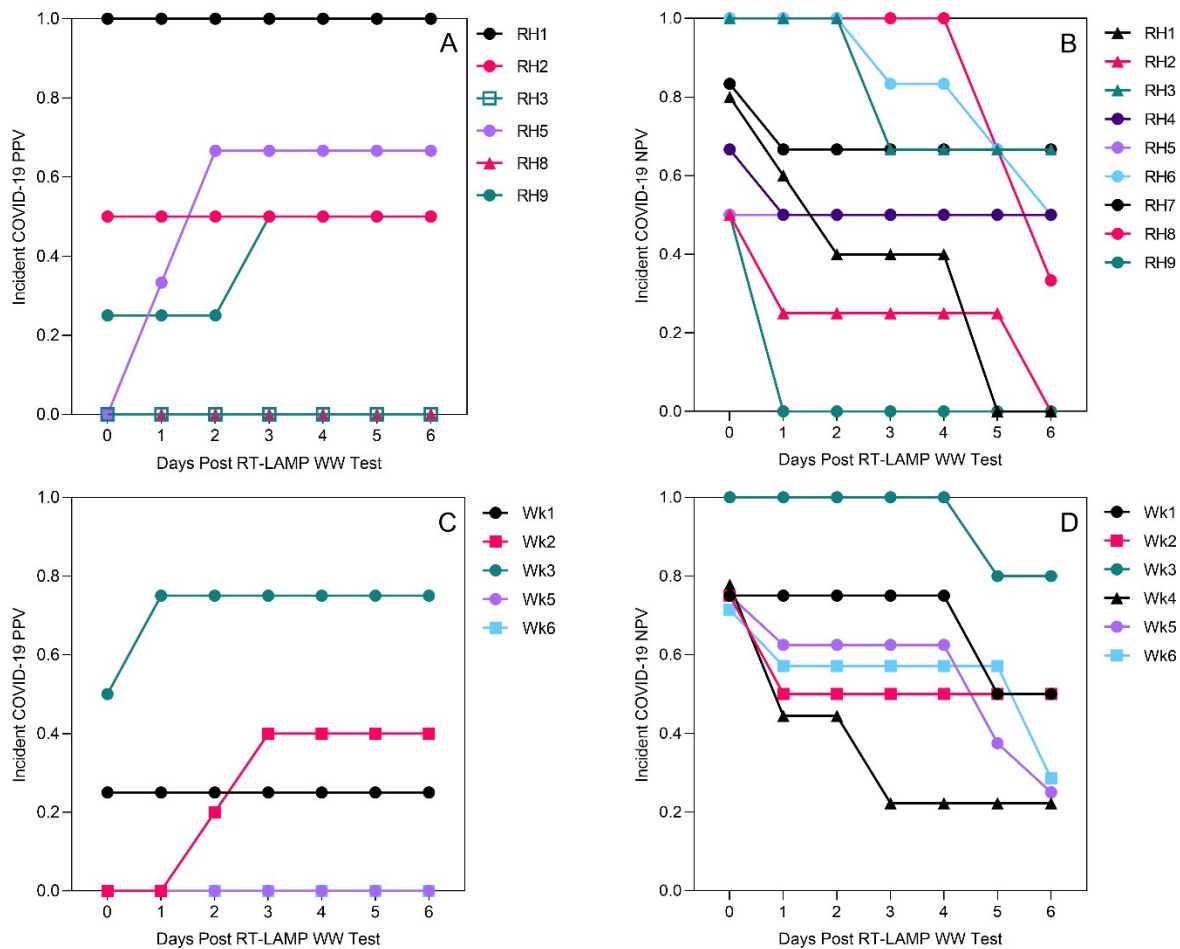

Figure S7 | Positive predictive value (PPV) of RT-LAMP wastewater monitoring (1 of 3 replicates positive) for incident COVID-19 cases from 1 to 7 days post wastewater testing (A) as observed during 6 weeks of monitoring among nine residence halls and (C) as observed among nine residence halls each week for six weeks. Negative predictive value (NPV) of RT-LAMP wastewater monitoring for incident COVID-19 cases from 1 to 7 days post wastewater testing (B) as observed during 6 weeks of monitoring among nine residence halls and (D) as observed among nine residence halls each week for six weeks.

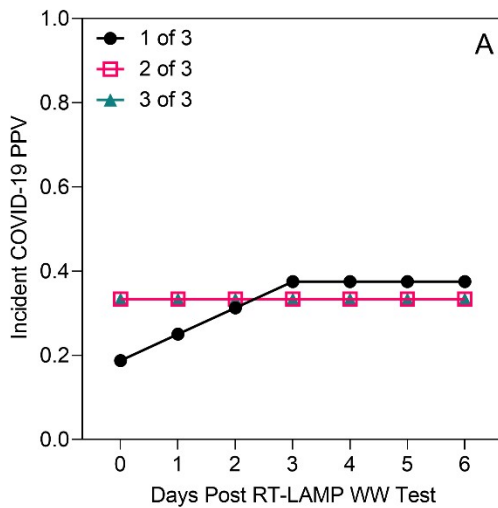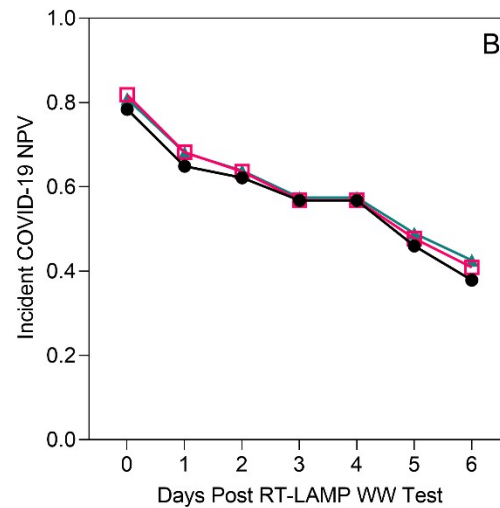

169  
 170 Figure S8 | PPV (A) and NPV (B) in the seven days following wastewater monitoring by tampon  
 171 swab and RT-LAMP with three different cutoff classifications (1 of 3 reactions, 2 of 3 reactions, 3  
 172 of 3 reactions) as observed during monitoring of wastewater from nine residence halls for six  
 173 weeks.  
 174

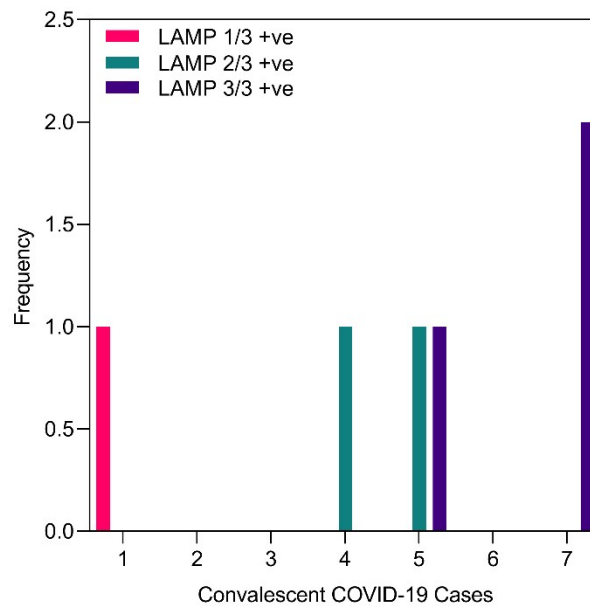

175  
 176  
 177 Figure S9 | Cumulative convalescent COVID-19 cases returning from isolation to residence halls  
 178 in the seven days prior to RT-LAMP wastewater testing when there were no incident COVID-19  
 179 cases observed in the seven days following wastewater testing color coded by LAMP positivity  
 180 cutoffs (1 of 3, 2 of 3, and 3 of 3 reactions positive for SARS-CoV-2 RNA).  
 181

## References

1. Ye Y, Ellenberg RM, Graham KE, Wigginton KR. Survivability, Partitioning, and Recovery of Enveloped Viruses in Untreated Municipal Wastewater. *Environ Sci Technol*. 2016;50(10):5077–85.
2. Li B, Di DYW, Saingam P, Jeon MK, Yan T. Fine-Scale Temporal Dynamics of SARS-CoV-2 RNA Abundance in Wastewater during A COVID-19 Lockdown. *Water Res* [Internet]. 2021 Jun;197:117093. Available from: <https://linkinghub.elsevier.com/retrieve/pii/S0043135421002918>
